# Supplementary material for: Disruption of the ATXN1-CIC complex reveals the role of additional nuclear ATXN1 interactors in spinocerebellar ataxia type 1
Source: PubMed Central journal article supplement (PMC9957872; doi:10.1016/j.neuron.2022.11.016), 2022-12-27
Supplement: NIHMS1859677-supplement-MMC1.pdf [file NIHMS1859677-supplement-MMC1.pdf]

**Supplemental information**

**Disruption of the ATXN1-CIC complex reveals  
the role of additional nuclear ATXN1 interactors  
in spinocerebellar ataxia type 1**

**Stephanie L. Coffin, Mark A. Durham, Larissa Nitschke, Eder Xhako, Amanda M. Brown, Jean-Pierre Revelli, Esmeralda Villavicencio Gonzalez, Tao Lin, Hillary P. Handler, Yanwan Dai, Alexander J. Trostle, Ying-Wooi Wan, Zhandong Liu, Roy V. Sillitoe, Harry T. Orr, and Huda Y. Zoghbi**

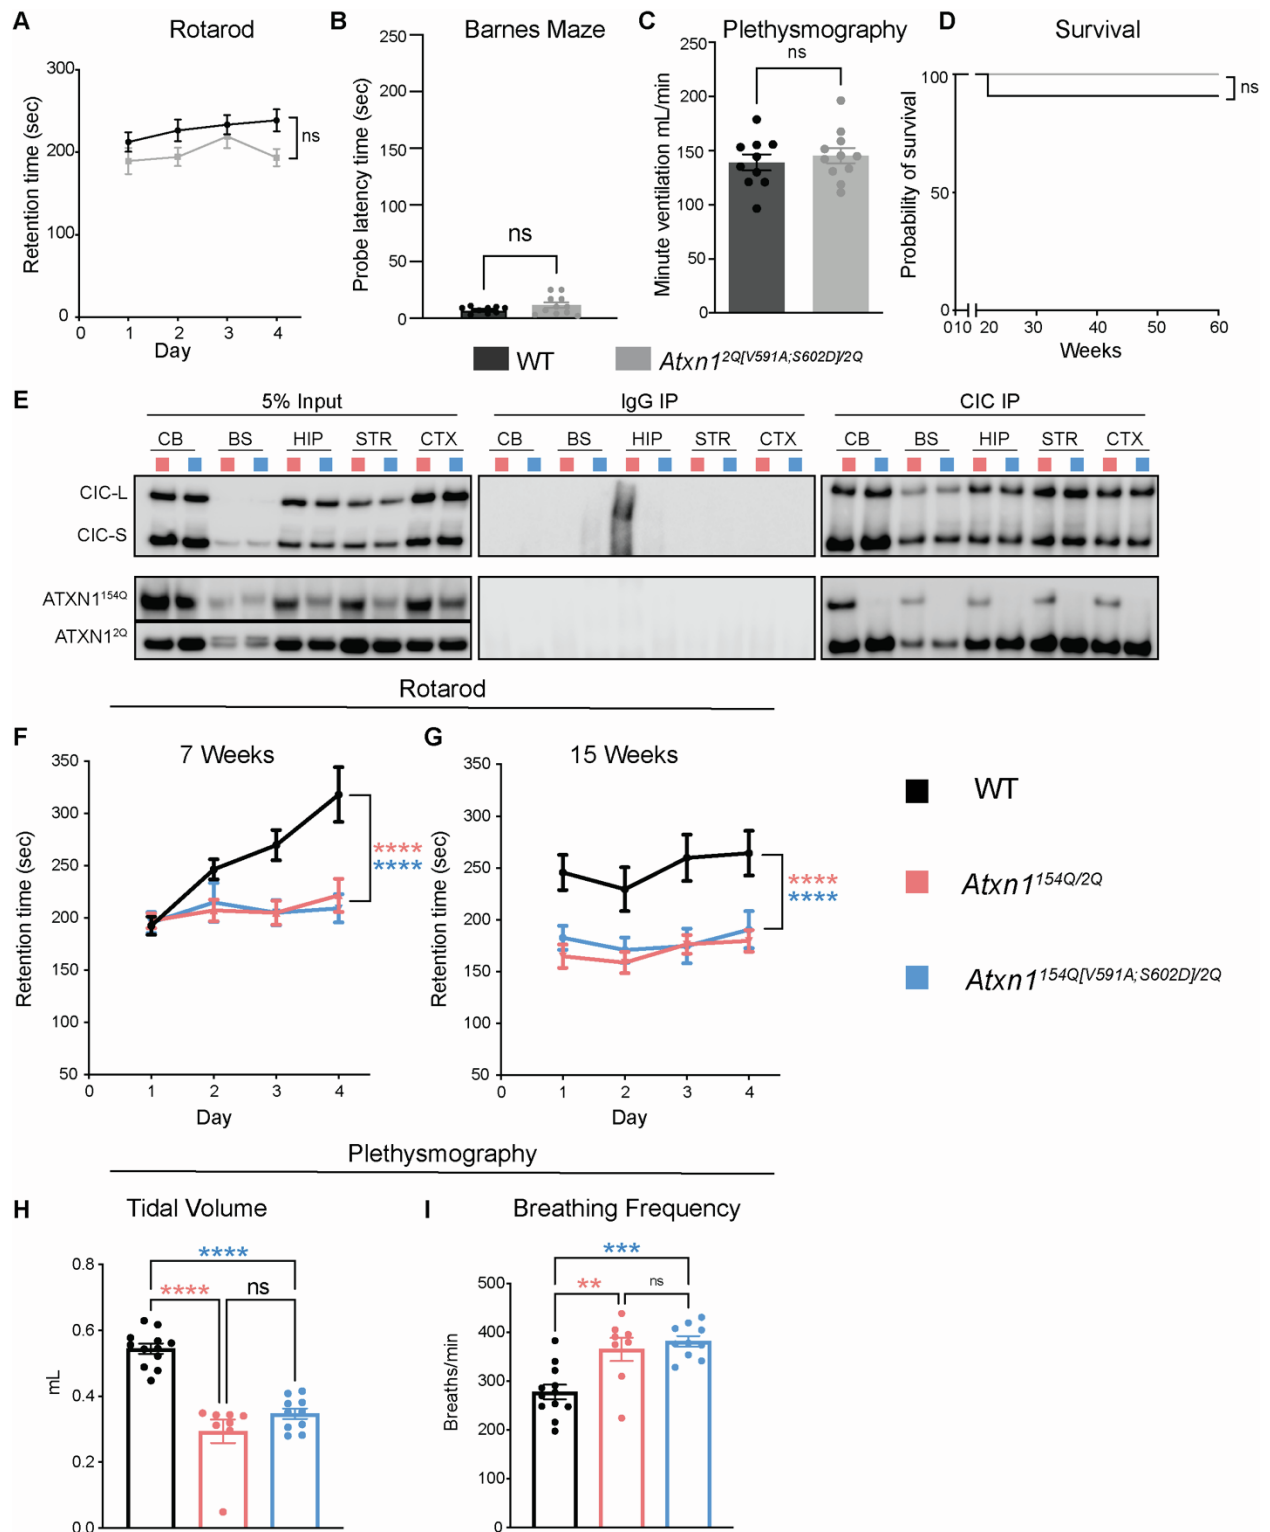

**Supplemental Figure 1. Global loss of ATXN1<sup>154Q</sup>-CIC binding partially improves SCA1 phenotypes. Related to Figure 1 and 2. A)** Rotarod assay at 7-weeks of age in WT and *Atxn1*<sup>2Q[V591A;S602D]/2Q</sup> mice. **B)** Barnes maze at 14-weeks of age in WT and *Atxn1*<sup>2Q[V591A;S602D]/2Q</sup> mice. **C)** Minute ventilation as measured via

plethysmography at 40-weeks of age in WT and *Atxn1*<sup>2Q[V591A;S602D]/2Q</sup> mice. **D)** Survival analysis of WT and *Atxn1*<sup>2Q[V591A;S602D]/2Q</sup> mice. **E)** Immunoprecipitation (IP) of CIC and representative western blot for ATXN1 and CIC in *Atxn1*<sup>154Q/2Q</sup> and *Atxn1*<sup>154Q[V591A;S602D]/2Q</sup> mice in cerebellum (CB), brainstem (BS), hippocampus (HIP), striatum (STR), and cortex (CTX) at 4-weeks of age. Rotarod assay in **F)** 7-week-old and **G)** 15-week-old WT, *Atxn1*<sup>154Q/2Q</sup> and *Atxn1*<sup>154Q[V591A;S602D]/2Q</sup> mice. Plethysmography measuring **H)** tidal volume and **I)** breathing frequency in WT, *Atxn1*<sup>154Q/2Q</sup> and *Atxn1*<sup>154Q[V591A;S602D]/2Q</sup> mice at 40-weeks of age. For each assay, a minimum of 8 mice were used. Two-way ANOVAs with Tukey's multiple comparisons were used for A, F and G. T-tests were used for B and C. Mantel-Cox log-rank was used for D. One-way ANOVAs with Tukey's multiple comparisons were used for H and I. In each case, \*, \*\*, \*\*\*, \*\*\*\* and ns denote p<0.05, p<0.01, p<0.001, p<0.0001 and p>0.05, respectively. All data are represented as means ± SEM.

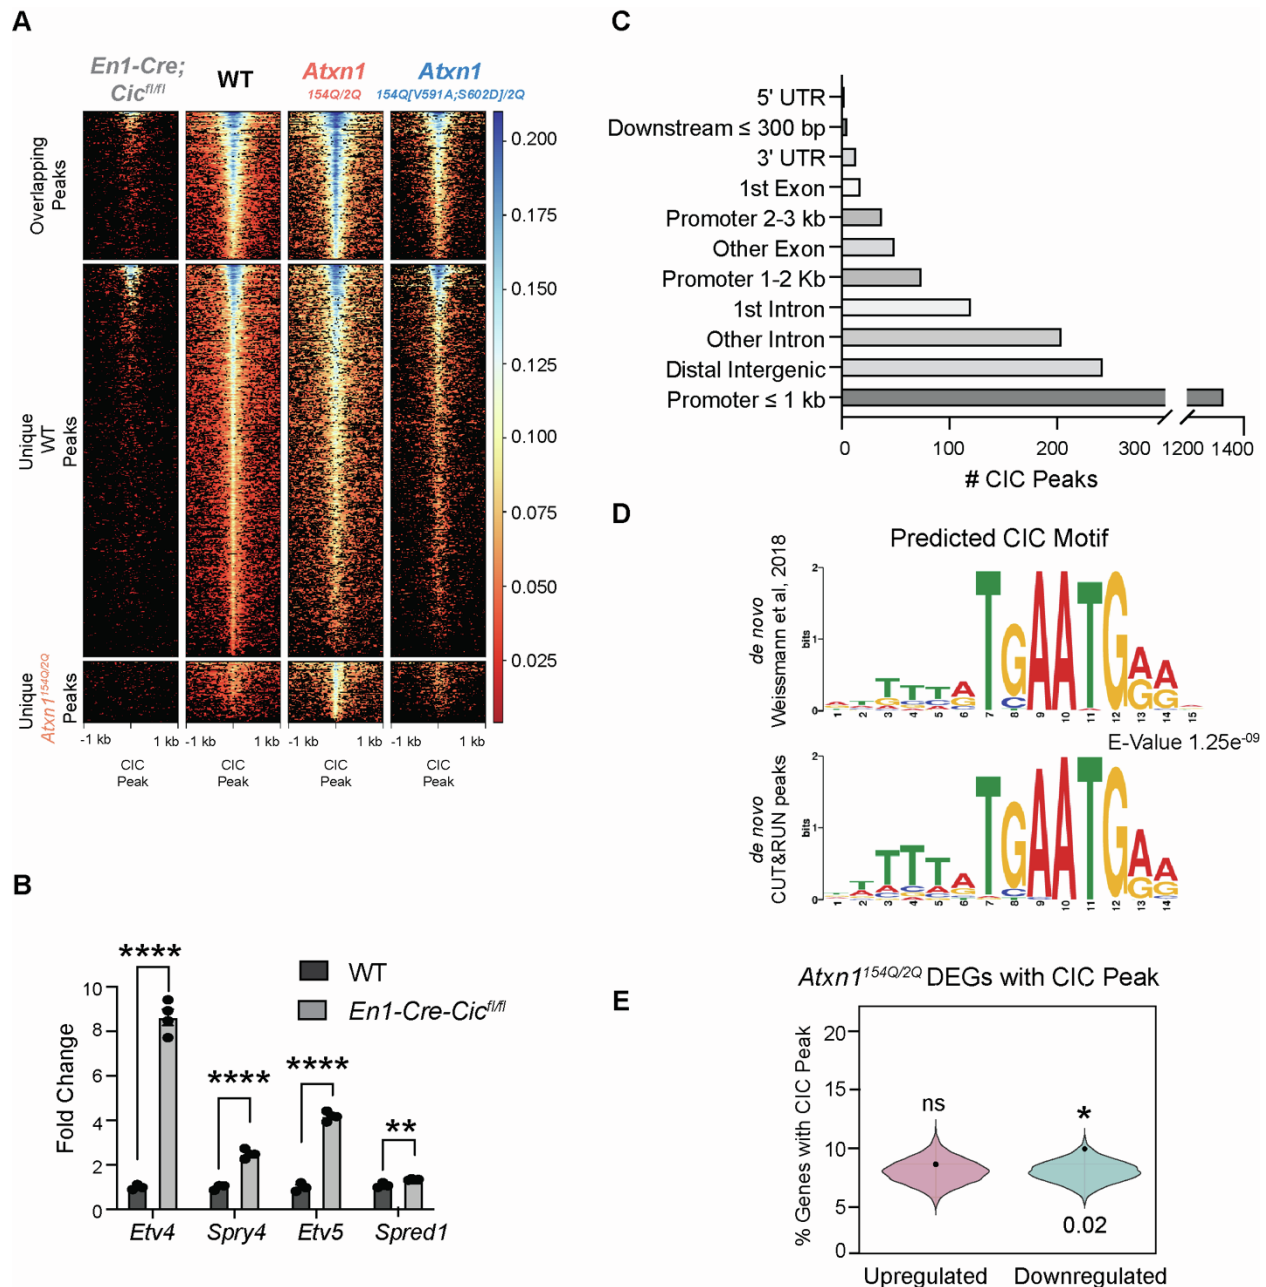

**Supplemental Figure 2. CIC peaks identify significant consensus motif and CIC as a transcriptional repressor in SCA1. Related to Figure 3.** **A)** Heatmap of CIC signal at unique and overlapping peaks for WT and *Atxn1*<sup>154Q/2Q</sup>. **B)** Fold change of normalized gene counts in WT and *En1-Cre;Cic*<sup>fl/fl</sup> mice for CIC target genes. RNA-sequencing data from Rousseaux et al., 2018. **C)** Distribution of *Atxn1*<sup>154Q/2Q</sup> CIC peaks by gene element. **D)** TOMTOM analysis comparing *de novo* CIC motifs generated from CUT&RUN data here and previously published CHIP-seq data from Weissman et al, 2018. Two motifs and the corresponding E-value of the strength of the similarity depicted. **E)** Violin plots of CIC peak enrichment in *Atxn1*<sup>154Q/2Q</sup> up and down-regulated DEGs compared to random genes, ran over 10,000 experiments. T-Tests were used in B. In each case, \*, \*\*, \*\*\*, \*\*\*\* and ns denote  $p < 0.05$ ,  $p < 0.01$ ,  $p < 0.001$ ,  $p < 0.0001$  and  $p > 0.05$ , respectively.

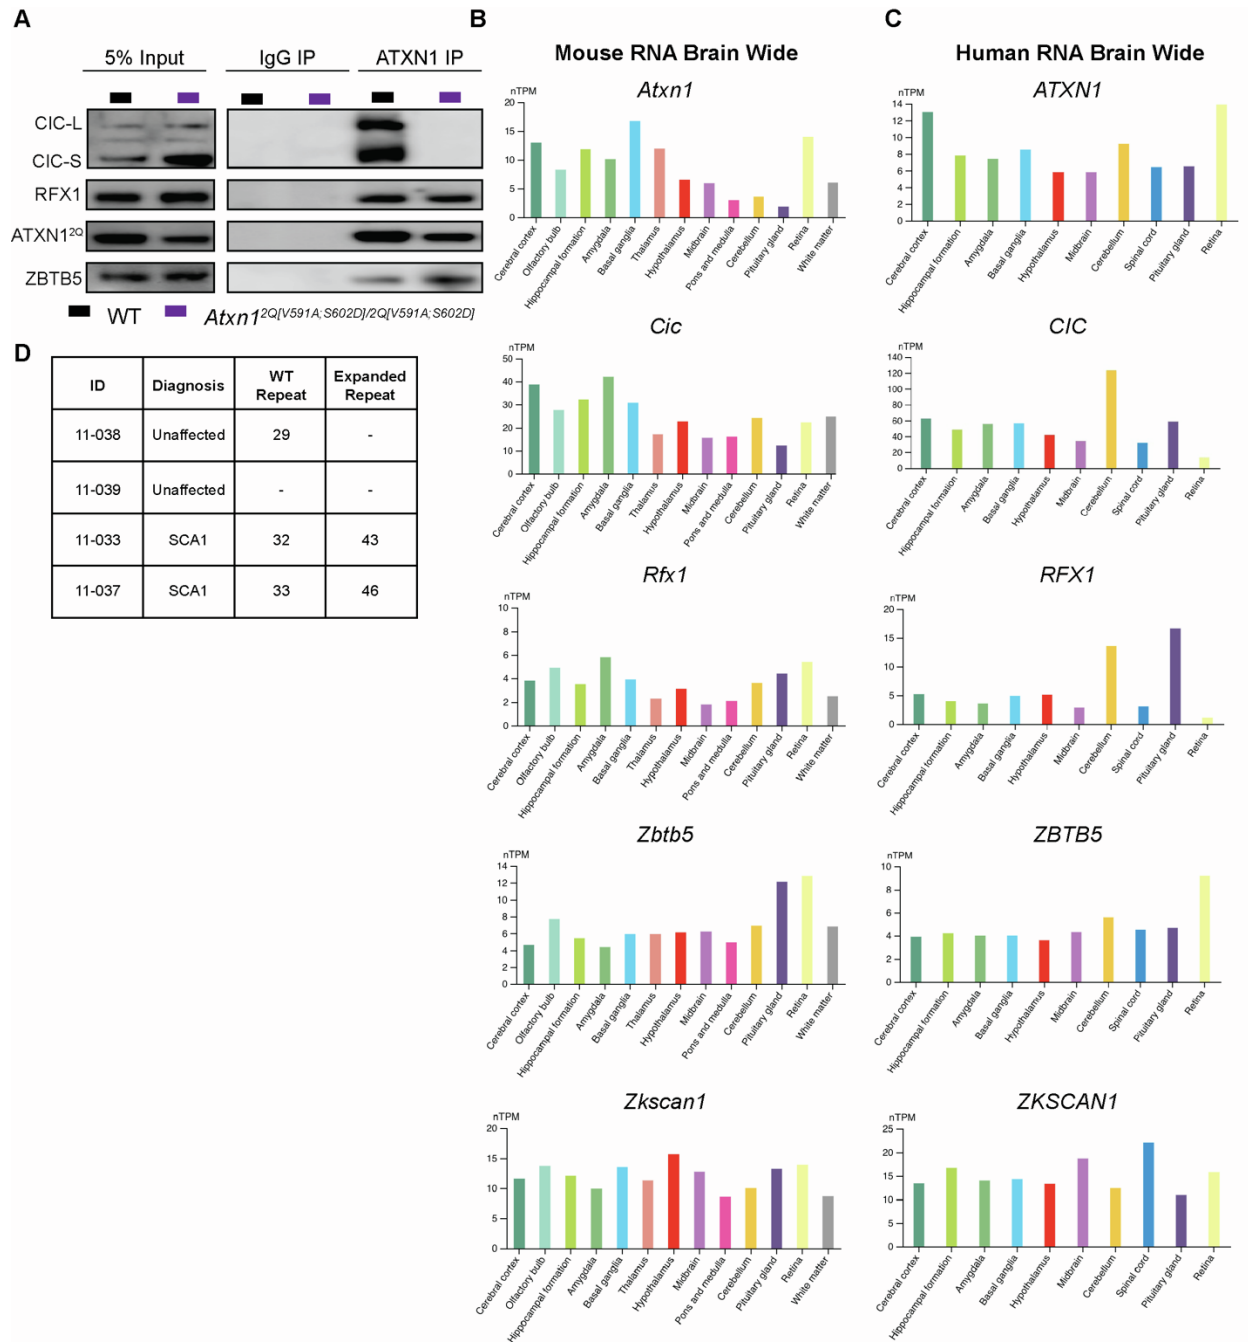

**Supplemental Figure 3. Novel ATXN1 interactors are expressed brain wide. Related to Figure 4. A)** Representative western blot showing the pulldown of ATXN1, CIC, RFX1 and ZBTB5 upon immunoprecipitation (IP) of ATXN1 in cerebella of WT and *Atxn1*<sup>2Q[V591A;S602D]/2Q[V591A;S602D]</sup> mice at 4-weeks of age. **B)** Human protein atlas RNA expression of mouse *Atxn1*, *Cic*, *Rfx1*, *Zbtb5*, and *Zkscan1* brain wide. **C)** GTEx RNA expression of human *ATXN1*, *CIC*, *RFX1*, *ZBTB5*, and *ZKSCAN1* brain wide. **D)** CAG repeat information of unaffected sibling and SCA1 patient samples collected for iPSC and iNeuron differentiation.
